# Supplementary material
Source: Research Square preprint supplement (doi:10.21203/rs.3.rs-9666426/v1)
Supplement: Supplementary file 1 [file ba574cf86581249ea8b5432a.docx]

***Supplementary Information***

**Microbial exopolysaccharide–mediated enhancement of Deep eutectic solvent‑based eutectogels for sustainable functional biomaterials**

Bryan Fernando Páramo Chávez1; Blanca Rosa Aguilar Uscanga1; Álvaro de Jesús Martínez Gómez1; María Guadalupe Morán Aguilar1,2;Fabiola Vilaseca2;Iván Costa Trigo3; Josué Raymundo Solís-Pacheco1*

1 Centro Universitario de Ciencias Exactas e Ingenierías (CUCEI), Universidad de Guadalajara, Guadalajara 4430, Jal; [bryan.paramo7767@alumnos.udg.mx](mailto:bryan.paramo7767@alumnos.udg.mx) (B.F.P-C); blanca.aguilar@academicos.udg.mx (B.R.A.-U.); [alvaro.mgomez@academicos.udg.mx](mailto:alvaro.mgomez@academicos.udg.mx) (A.J.M.-G.).

2 Advanced Biomaterials and Nanotechnology (BIMATEC), Department of Chemical and Agricultural Engineering, and Agrifood Technology, University of Girona, C/ M. Aurèlia Capmany, 61, 17003 Girona, Spain; lu.moag91@gmail.com (M.G.M.-A.).

3 LNEG —National Laboratory of Energy and Geology, Bioenergy and Biorefineries Unit, Estrada do Paço do Lumiar, 22, 1649-038 Lisbon, Portugal; [ivan.trigo@lneg.pt](mailto:ivan.trigo@lneg.pt) (I.C.-T).

Corresponding authors: J.R.S.-P. ([raymundo.solis@academicos.udg.mx](mailto:raymundo.solis@academicos.udg.mx)).

| 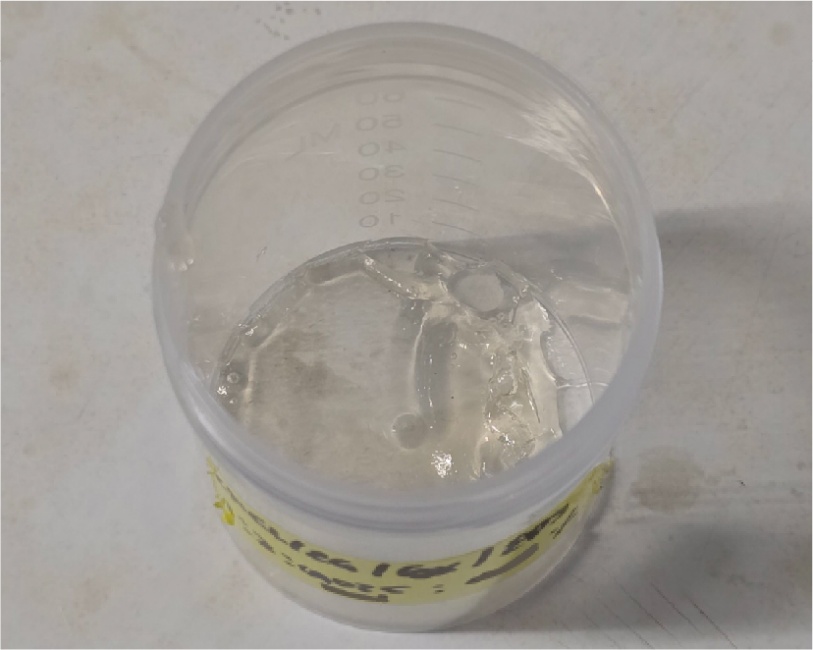 |  | 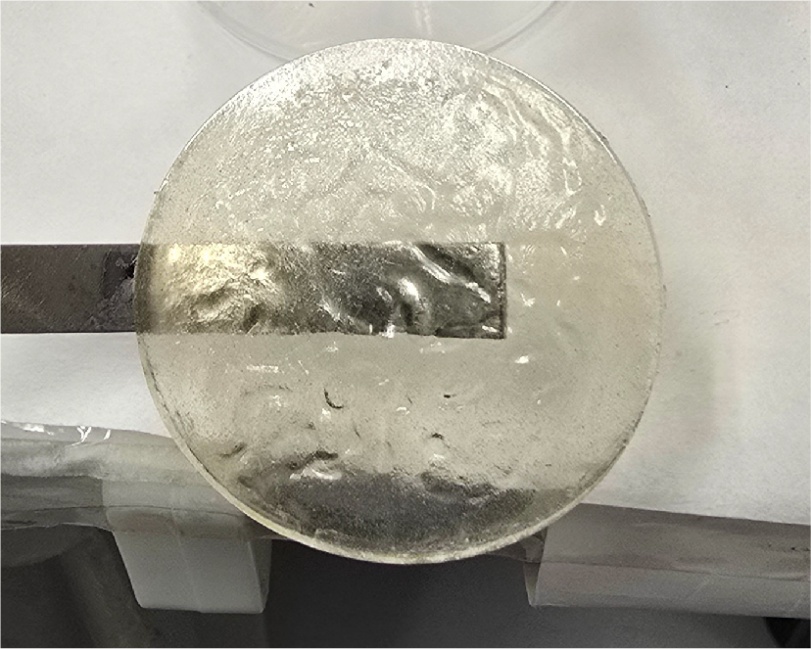 |  | 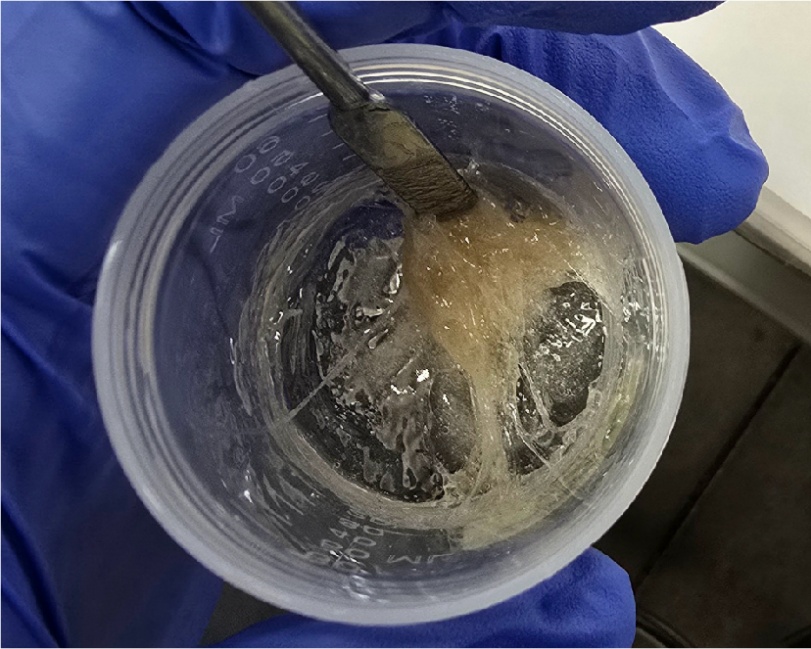 |  | 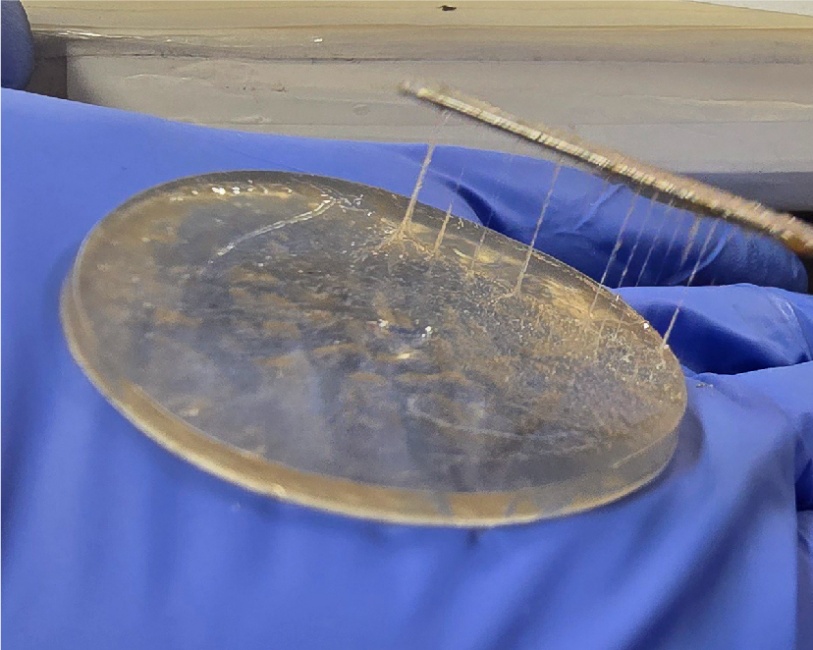 | |
| --- | --- | --- | --- | --- | --- | --- | --- |
|  |  |  |  |  |  |  |
| **ChCl:EG:AA** |  | **ChCl:Xyl:AA** |  | **ChCl:LA:AA** |  | **ChCl:XG:AA** |

**Fig. S1.** Deep eutectic solvent (DES) combinations prepared using choline chloride with ethylene glycol (EG), xylitol (Xyl), lactic acid (LA), and xanthan gum (XG). All DESs were formulated at a 1:1 molar ratio and supplemented with 30 wt% acrylic acid (AA) and 1.0 wt% exopolysaccharide relative to AA.


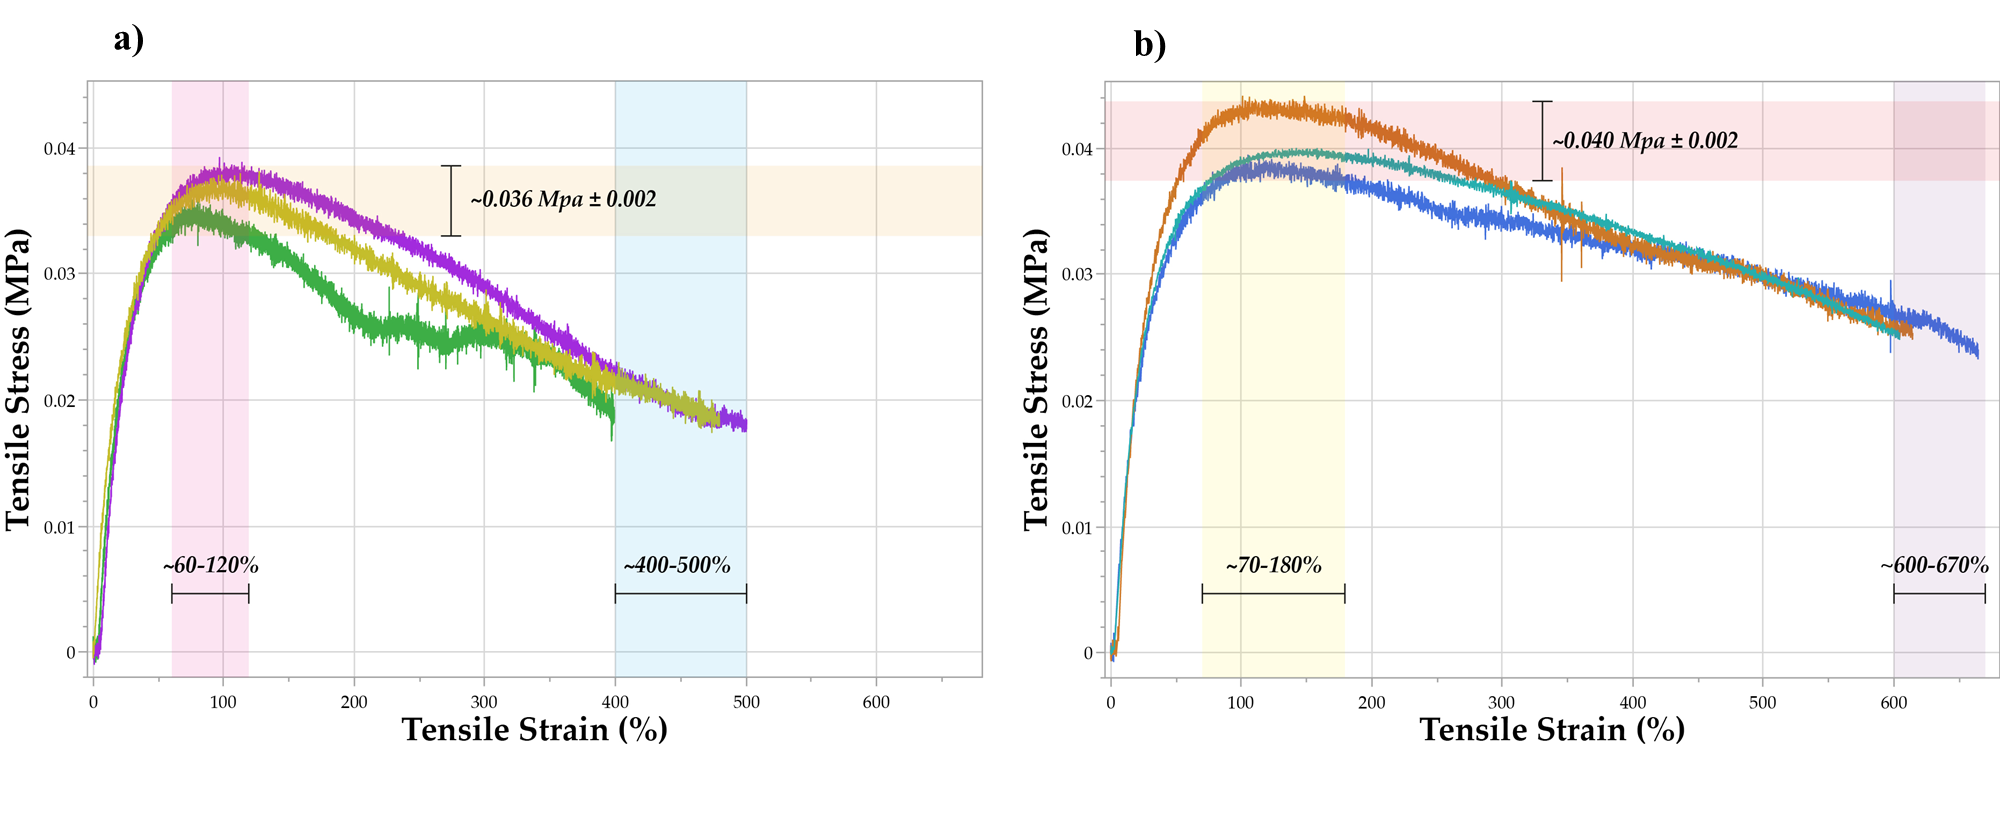
**Figure S2.** Tensile stress–strain profiles profiles of DES‑based Egels: a) Egel without EPS; (b) Egel with EPS.
